# Supplementary material
Source: PubMed Central journal article supplement (PMC3309285)
Supplement: mmc1.pdf [file mmc1.pdf]

## Supplementary Information for

### Kinetic schemes for post-synchronized single molecule dynamics

Chunlai Chen, Michael J. Greenberg, Joseph M. Laakso, E. Michael Ostap,

Yale E. Goldman, and Henry Shuman

#### Step by step analysis on synchronized translocation traces.

**Step 1:** Add a reaction to complete the enzymatic cycle, to ensure nonzero steady state populations.

Since only the last state (POST) is populated in the steady state of the translocation scheme in Fig 2C is modified (Fig. S1) to include two reactions that complete the enzymatic cycle. The two introduced reactions are from the last state (POST) to  $\text{PRE}^{\text{C}}$  and  $\text{PRE}^{\text{H}}$ . In order to maintain the equilibrium concentrations of  $\text{PRE}^{\text{C}}$  and  $\text{PRE}^{\text{H}}$  in the absence of EF-G, the ratio of the new reaction rates  $k_{\text{C3}}$  and  $k_{\text{H3}}$  must be:

$$k_{\text{C3}} / k_{\text{H3}} = k_{-1} / k_{+1} \quad \text{Eq. S1}$$

**Step 2:** solve the relative steady state concentrations analytically or numerically. The absolute concentrations are not needed; only ratios of the different states.

The steady state equations for scheme S1 are:

$$k_{\text{C1}} [\text{PRE}^{\text{C}}] + k_{-2} [\text{PRE-G}^{\text{H}}] = (k_{\text{C2}} + k_{+2}) [\text{PRE-G}^{\text{C}}] \quad \text{Eq. S2}$$

$$k_{\text{H1}} [\text{PRE}^{\text{H}}] + k_{+2} [\text{PRE-G}^{\text{C}}] = (k_{\text{H2}} + k_{-2}) [\text{PRE-G}^{\text{H}}] \quad \text{Eq. S3}$$

$$k_{\text{C3}} [\text{POST}] + k_{-1} [\text{PRE}^{\text{H}}] = (k_{\text{C1}} + k_{+1}) [\text{PRE}^{\text{C}}] \quad \text{Eq. S4}$$

$$k_{\text{H3}} [\text{POST}] + k_{+1} [\text{PRE}^{\text{C}}] = (k_{\text{H1}} + k_{-1}) [\text{PRE}^{\text{H}}] \quad \text{Eq. S5}$$

The concentration ratios formed from the steady state solutions of Eq. S1-5, which are essential for calculating reversed rates are:

$$\frac{[\text{PRE}^{\text{C}}]}{[\text{PRE}^{\text{H}}]} = (k_{-1} (k_{+1} + k_{\text{H1}} + k_{-1})) / (k_{+1} (k_{\text{C1}} + k_{+1} + k_{-1})) \quad \text{Eq. S6}$$

$$\frac{[\text{PRE}^{\text{C}}]}{[\text{PRE-G}^{\text{C}}]} = (k_{-1} (k_{+1} + k_{\text{H1}} + k_{-1}) (k_{+2} \cdot k_{\text{H2}} + k_{\text{C2}} (k_{\text{H2}} + k_{-2}))) / (k_{\text{C1}} \cdot k_{-1} (k_{+1} + k_{\text{H1}} + k_{-1}) k_{\text{H2}} + (k_{+1} + k_{-1}) (k_{+1} \cdot k_{\text{H1}} + k_{\text{C1}} (k_{\text{H1}} + k_{-1})) k_{-2}) \quad \text{Eq. S7}$$

$$\frac{[\text{PRE}^{\text{H}}]}{[\text{PRE-G}^{\text{H}}]} = (k_{+1} (k_{\text{C1}} + k_{+1} + k_{-1}) (k_{+2} \cdot k_{\text{H2}} + k_{\text{C2}} (k_{\text{H2}} + k_{-2}))) / (k_{+1} k_{\text{H1}} (k_{\text{C1}} + k_{+1} + k_{-1}) k_{\text{C2}} + (k_{+1} + k_{-1}) (k_{+1} \cdot k_{\text{H1}} + k_{\text{C1}} (k_{\text{H1}} + k_{-1})) k_{+2}) \quad \text{Eq. S8}$$

$$\frac{[\text{PRE-G}^{\text{H}}]}{[\text{PRE-G}^{\text{C}}]} = (k_{+1} \cdot k_{\text{H1}} (k_{\text{C1}} + k_{+1} + k_{-1}) k_{\text{C2}} + (k_{+1} + k_{-1}) (k_{+1} \cdot k_{\text{H1}} + k_{\text{C1}} (k_{\text{H1}} + k_{-1})) k_{+2}) / (k_{\text{C1}} \cdot k_{-1} (k_{+1} + k_{-1}) (k_{+1} + k_{\text{H1}} + k_{-1})) \quad \text{Eq. S9}$$

$$k_{H1} + k_{-1}) k_{H2} + (k_{+1} + k_{-1}) (k_{+1} \cdot k_{H1} + k_{C1} (k_{H1} + k_{-1})) k_{-2}) \quad \text{Eq. S9}$$

Note that these ratios are independent of the introduced reaction rates  $k_{C3}$  and  $k_{H3}$ .

**Step 3:** Calculate the transition rates for time reversed scheme.

The time-reversed rates in Fig. 2D as calculated from Eq. 3 (of the main text) are:

$$k'_{C1} = k_{C1} \frac{[\text{PRE}^C]}{[\text{PRE-G}^C]} = k_{C1} (k_{-1} (k_{+1} + k_{H1} + k_{-1}) (k_{+2} \cdot k_{H2} + k_{C2} (k_{H2} + k_{-2}))) / (k_{C1} \cdot k_{-1} (k_{+1} + k_{H1} + k_{-1}) k_{H2} + (k_{+1} + k_{-1}) (k_{+1} \cdot k_{H1} + k_{C1} (k_{H1} + k_{-1})) k_{-2}) \quad \text{Eq. S10}$$

$$k'_{H1} = k_{H1} \frac{[\text{PRE}^H]}{[\text{PRE-G}^H]} = k_{H1} (k_{+1} (k_{C1} + k_{+1} + k_{-1}) (k_{+2} \cdot k_{H2} + k_{C2} (k_{H2} + k_{-2}))) / (k_{+1} k_{H1} (k_{C1} + k_{+1} + k_{-1}) k_{C2} + (k_{+1} + k_{-1}) (k_{+1} \cdot k_{H1} + k_{C1} (k_{H1} + k_{-1})) k_{+2}) \quad \text{Eq. S11}$$

$$k'_{+1} = k_{+1} \frac{[\text{PRE}^C]}{[\text{PRE}^H]} = k_{+1} (k_{-1} (k_{+1} + k_{H1} + k_{-1})) / (k_{+1} (k_{C1} + k_{+1} + k_{-1})) \quad \text{Eq. S12}$$

$$k'_{-1} = k_{-1} \frac{[\text{PRE}^H]}{[\text{PRE}^C]} = k_{-1} (k_{+1} (k_{C1} + k_{+1} + k_{-1})) / (k_{-1} (k_{+1} + k_{H1} + k_{-1})) \quad \text{Eq. S13}$$

$$k'_{+2} = k_{+2} \frac{[\text{PRE-G}^C]}{[\text{PRE-G}^H]} = k_{+2} (k_{C1} \cdot k_{-1} (k_{+1} + k_{H1} + k_{-1}) k_{H2} + (k_{+1} + k_{-1}) (k_{+1} \cdot k_{H1} + k_{C1} (k_{H1} + k_{-1})) k_{-2}) / (k_{+1} \cdot k_{H1} (k_{C1} + k_{+1} + k_{-1}) k_{C2} + (k_{+1} + k_{-1}) (k_{+1} \cdot k_{H1} + k_{C1} (k_{H1} + k_{-1})) k_{+2}) \quad \text{Eq. S14}$$

$$k'_{-2} = k_{-2} \frac{[\text{PRE-G}^H]}{[\text{PRE-G}^C]} = k_{-2} (k_{+1} \cdot k_{H1} (k_{C1} + k_{+1} + k_{-1}) k_{C2} + (k_{+1} + k_{-1}) (k_{+1} \cdot k_{H1} + k_{C1} (k_{H1} + k_{-1})) k_{+2}) / (k_{C1} \cdot k_{-1} (k_{+1} + k_{H1} + k_{-1}) k_{H2} + (k_{+1} + k_{-1}) (k_{+1} \cdot k_{H1} + k_{C1} (k_{H1} + k_{-1})) k_{-2}) \quad \text{Eq. S15}$$

**Step 4:** Treat the averaged trajectory before the trigger point as a “time-reversed” perturbation experiment and extract its kinetics using the time-reversed rate constants

The experimental rates,  $k_{C\text{-sync}}$  and  $k_{H\text{-sync}}$ , fitted from synchronized traces in Fig. 2B are eigenvalues of reversed reaction scheme (Fig. 2D):

$$\frac{1}{2} \left( k'_{C1} + k'_{H1} + k'_{+2} + k'_{-2} + \sqrt{(k'_{C1} + k'_{H1} + k'_{+2} + k'_{-2})^2 - 4 (k'_{C1} k'_{H1} + k'_{C1} k'_{+2} + k'_{H1} k'_{-2})} \right) = \max(k_{C\text{-sync}}, k_{H\text{-sync}}) \quad \text{Eq. S16}$$

$$\frac{1}{2} \left( k'_{C1} + k'_{H1} + k'_{+2} + k'_{-2} - \sqrt{(k'_{C1} + k'_{H1} + k'_{+2} + k'_{-2})^2 - 4 (k'_{C1} k'_{H1} + k'_{C1} k'_{+2} + k'_{H1} k'_{-2})} \right) = \min(k_{C\text{-sync}}, k_{H\text{-sync}})$$

Eq. S17

$k_{+1}$ ,  $k_{-1}$ ,  $k_{C2}$ ,  $k_{H2}$ ,  $k_{C\text{-sync}}$ , and  $k_{H\text{-sync}}$  are experimentally measured rates determined in our previous study (1). At 2  $\mu\text{M}$  EF-G, values of both  $k_{C1}$  and  $k_{H1}$  are set to  $100 \text{ s}^{-1}$  based on the previously reported EF-G binding rate (2). Combining and simplifying Eqs. S10-17 using the known values of  $k_{+1}$ ,  $k_{-1}$ ,  $k_{C2}$ ,  $k_{H2}$ ,  $k_{C\text{-sync}}$ ,  $k_{H\text{-sync}}$ ,  $k_{C1}$ , and  $k_{H1}$ , leads to two independent equations and two unknowns,  $k_{+2}$  and  $k_{-2}$ , the transition rates between classical and hybrid PRE states after EF-G binding. The resulting values of  $k_{+2}$  and  $k_{-2}$  for three different types of ribosome complexes (Table S1) are, in all cases, not significantly different from zero and smaller than  $k_{+1}$  and  $k_{-1}$ . These results indicate that EF-G binding suppresses transitions between the classical and hybrid PRE states prior to translocation. In a homogeneous system, the two synchronized traces in Fig. 2B are expected to extrapolate back to the same value. Due to heterogeneity of the sample discussed previously (1, ribosomes translocating from the classic and hybrid states are apparently different), the back extrapolations of two traces do not meet.

Table S1 Reaction rates for translocation examples.

| Complex   | Experimental data (s <sup>-1</sup> ) <sup>a</sup> |              |           |              |           |           | calculated from model (s <sup>-1</sup> ) <sup>b</sup> |             |
|-----------|---------------------------------------------------|--------------|-----------|--------------|-----------|-----------|-------------------------------------------------------|-------------|
|           | $k_{C2}$                                          | $k_{C-sync}$ | $k_{H2}$  | $k_{H-sync}$ | $k_{+1}$  | $k_{-1}$  | $k_{+2}$                                              | $k_{-2}$    |
| PRE-I-Lt  | 0.31±0.06                                         | 0.37±0.07    | 0.13±0.04 | 0.14±0.02    | 0.59±0.06 | 0.77±0.05 | 0.057±0.072                                           | 0.013±0.049 |
| PRE-II-Lt | 0.30±0.03                                         | 0.48±0.11    | 0.36±0.05 | 0.32±0.04    | 0.56±0.05 | 0.73±0.10 | 0.06±0.12                                             | 0.08±0.09   |
| PRE-II-tt | 0.25±0.06                                         | 0.31±0.05    | 0.68±0.03 | 0.83±0.13    | 0.59±0.04 | 0.67±0.06 | 0.08±0.09                                             | 0.13±0.10   |

<sup>a</sup> Experimental data are from our previous study (1).

<sup>b</sup>  $k_{C1} = 100 \text{ s}^{-1}$  and  $k_{H1} = 100 \text{ s}^{-1}$  are used based previous study (2).

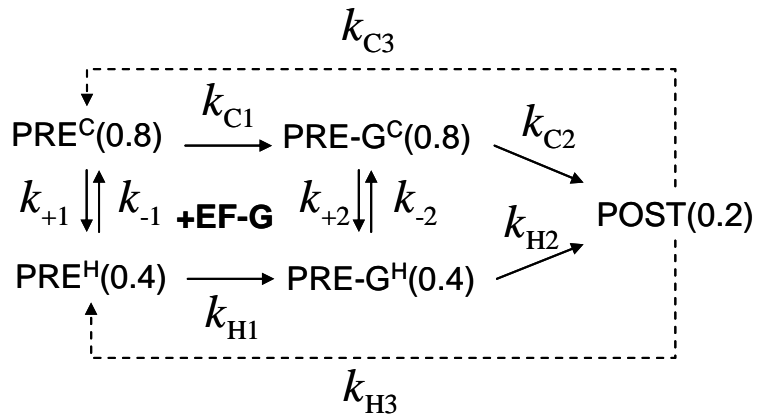

**Fig. S1** Forward scheme of translocation with introduced reactions (dash lines) to produce non-zero steady state populations. The introduced reactions are from the last state to the first state (equilibrium between  $\text{PRE}^{\text{C}}$  and  $\text{PRE}^{\text{H}}$  in the absence of EF-G), which satisfies Eq. S1.

## REFERENCES:

1. Chen, C., B. Stevens, J. Kaur, D. Cabral, H. Liu, Y. Wang, H. Zhang, G. Rosenblum, Z. Smilansky, Y. E. Goldman, and B. S. Cooperman. 2011. Single-Molecule Fluorescence Measurements of Ribosomal Translocation Dynamics. *Mol cell* 42:367-377.
2. Savelsbergh, A., V. I. Katunin, D. Mohr, F. Peske, M. V. Rodnina, and W. Wintermeyer. 2003. An elongation factor G-induced ribosome rearrangement precedes tRNA-mRNA translocation. *Mol Cell* 11:1517-1523.
